# Supplementary material for: Effects of Cultivation Management on Pearl Millet Yield and Growth Differed with Rainfall Conditions in a Seasonal Wetland of Sub-Saharan Africa
Source: MDPI journal article supplement (doi:10.3390/agronomy11091767), 2021-09-02
Supplement: s1 [file s1]

**Supplemental Table****Table S1.** Means for comparison of yield and yield components of pearl millet between ridge and furrow plots.

(a) 2017

|         | Grain<br>Yield<br>(ton ha <sup>-1</sup> ) | Total dry<br>weight<br>(ton ha <sup>-1</sup> ) | Harvest<br>index | Panicle<br>density<br>(m <sup>-2</sup> ) | Grain<br>density<br>(10 <sup>2</sup> ) | 1000-grain<br>weight<br>(g) |
|---------|-------------------------------------------|------------------------------------------------|------------------|------------------------------------------|----------------------------------------|-----------------------------|
| Furrow  |                                           |                                                |                  |                                          |                                        |                             |
| None    | 0.08                                      | 0.40                                           | 0.19             | 1.4                                      | 4.2                                    | 13.6                        |
| Manure  | 0.21                                      | 0.58                                           | 0.37             | 2.7                                      | 5.0                                    | 16.2                        |
| Mineral | 0.24                                      | 1.12                                           | 0.22             | 3.0                                      | 5.4                                    | 15.0                        |
| Ridge   |                                           |                                                |                  |                                          |                                        |                             |
| None    | 0.39                                      | 1.51                                           | 0.26             | 3.6                                      | 7.0                                    | 15.7                        |
| Manure  | 0.60                                      | 1.70                                           | 0.23             | 3.8                                      | 6.5                                    | 16.1                        |
| Mineral | 1.08                                      | 2.87                                           | 0.29             | 5.8                                      | 8.3                                    | 18.0                        |

(b) 2018

|         | Grain<br>Yield<br>(ton ha <sup>-1</sup> ) | Total dry<br>weight<br>(ton ha <sup>-1</sup> ) | Harvest<br>index | Panicle<br>density<br>(m <sup>-2</sup> ) | Grain<br>density<br>(10 <sup>2</sup> ) | 1000-grain<br>weight<br>(g) |
|---------|-------------------------------------------|------------------------------------------------|------------------|------------------------------------------|----------------------------------------|-----------------------------|
| Furrow  |                                           |                                                |                  |                                          |                                        |                             |
| None    | 0.59                                      | 1.31                                           | 0.45             | 6.0                                      | 5.7                                    | 17.0                        |
| Manure  | 1.93                                      | 3.85                                           | 0.57             | 6.3                                      | 20.0                                   | 17.4                        |
| Mineral | 1.38                                      | 2.79                                           | 0.49             | 6.3                                      | 13.8                                   | 16.2                        |
| Ridge   |                                           |                                                |                  |                                          |                                        |                             |
| None    | 1.45                                      | 3.25                                           | 0.46             | 4.0                                      | 25.3                                   | 15.5                        |
| Manure  | 2.17                                      | 4.20                                           | 0.46             | 6.9                                      | 16.5                                   | 15.9                        |
| Mineral | 1.87                                      | 4.54                                           | 0.41             | 6.9                                      | 17.1                                   | 17.8                        |
